# Supplementary material for: Annelid phylogeny and the status of Sipuncula and Echiura
Source: Springer Nature journal article supplement (doi:10.1186/1471-2148-7-57), 2007-04-05
Supplement: 12862_2006_351_MOESM1_ESM.pdf [file 12862_2006_351_MOESM1_ESM.pdf]

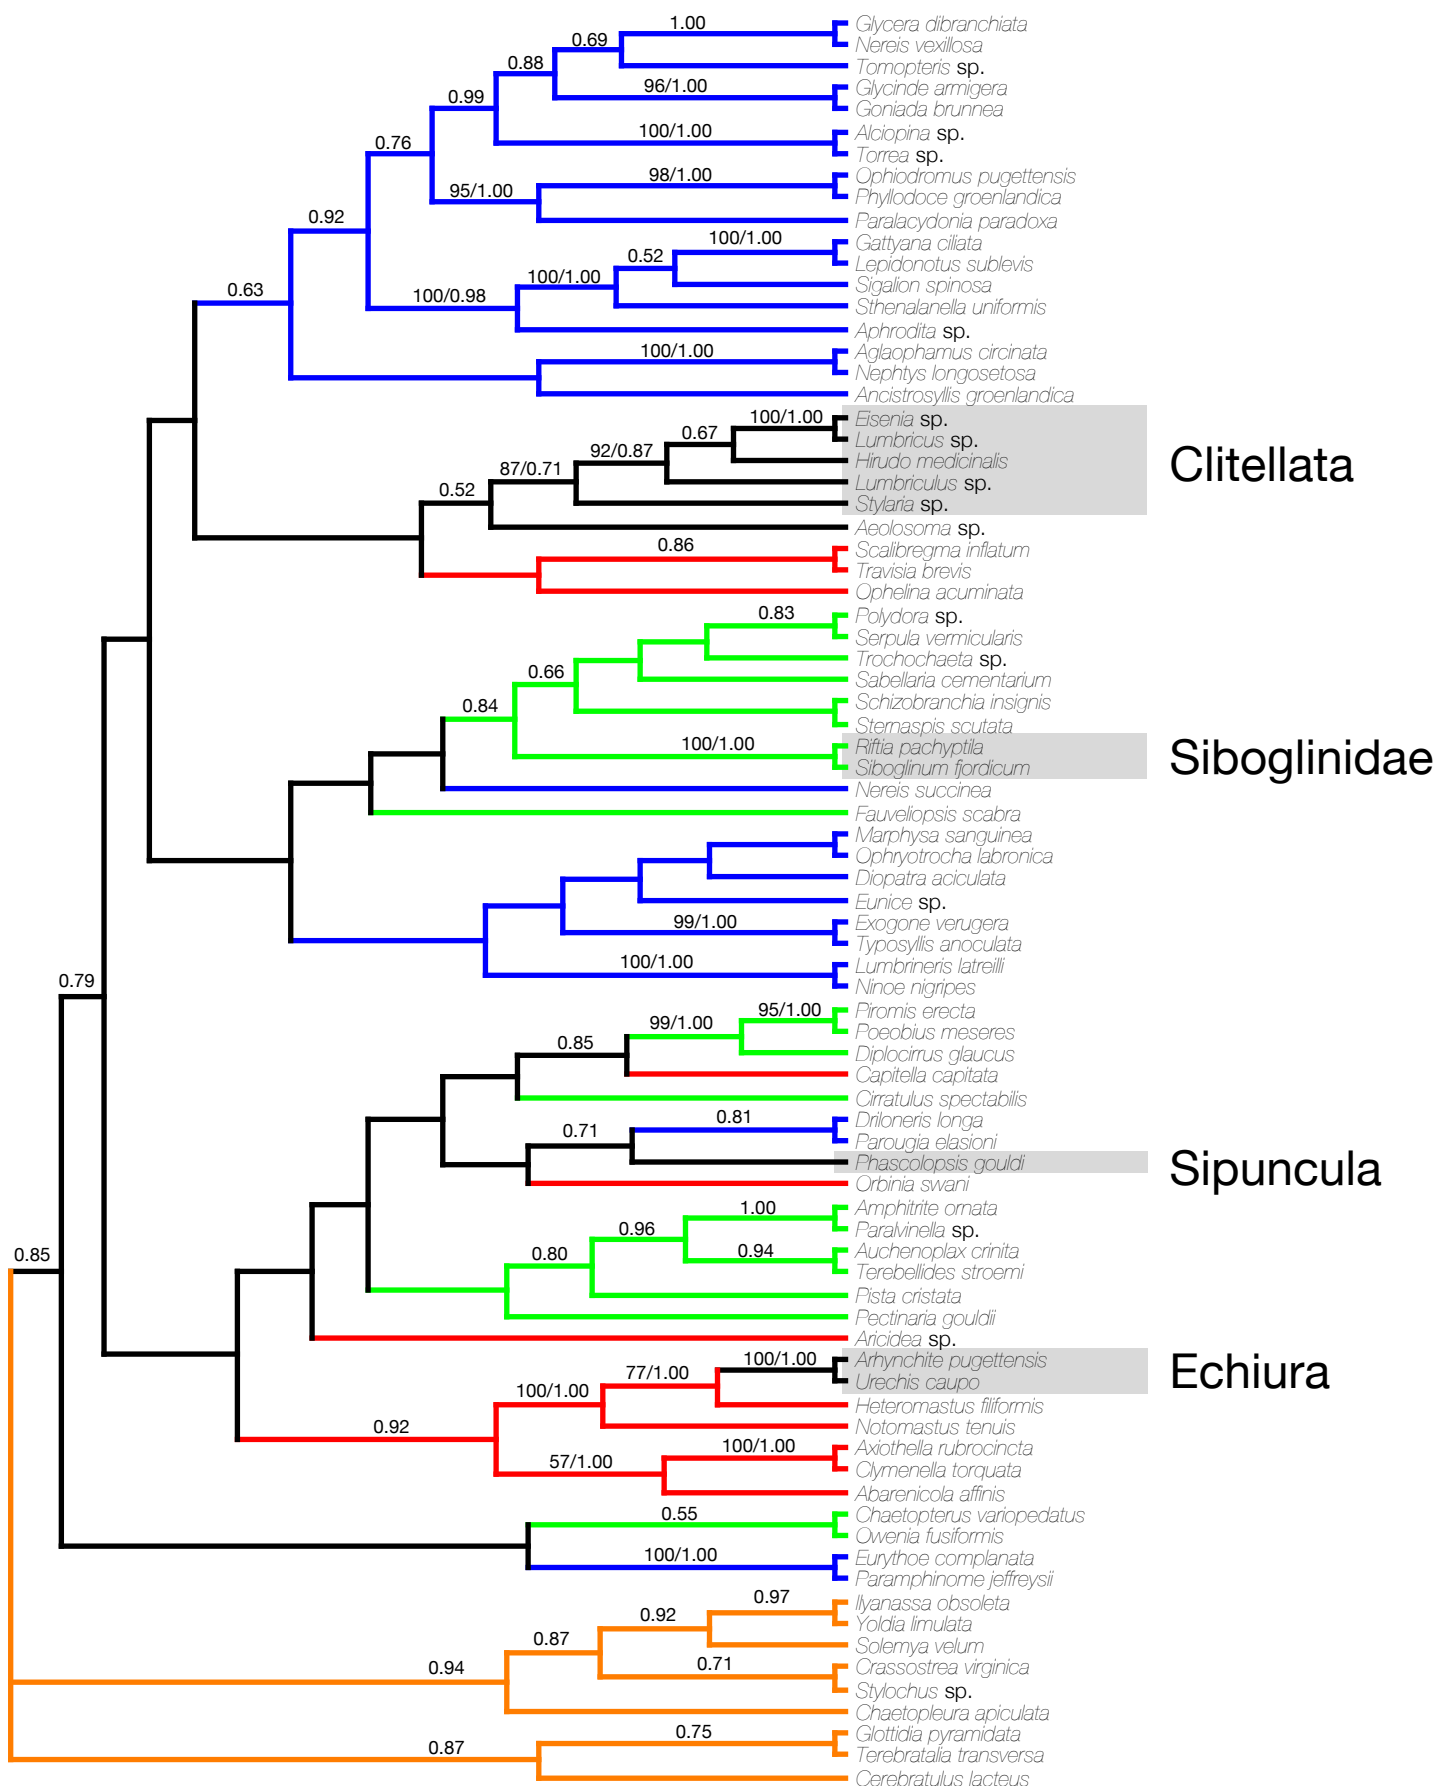

**Supplementary Fig. 1.** Cladogram of ML analysis and BI of 28S partition with 81 taxa (-ln L = 34,291.15). 28S consisted of 5,832 characters, from which 2,504 unambiguously aligned and non-saturated ones were included. BS values above 50 shown at the branches on the left; PP's on the right or alone. ML settings: Base frequencies: A = 0.2484, C = 0.2505, G = 0.2876, T = 0.2135; Rate matrix: AC, AT, CG, GT = 1.0000, AG = 2.8403, CT = 6.2058;  $\alpha$  = 0.452; Proportion of invariant sites = 0.2367. Models in BI: GTR+I+ $\Gamma$ . Clitellata, Echiura, Siboglinidae, Sipuncula highlighted with gray, Aciculata = blue, Canalipalpata = green, Scolecida = red, Outgroup = orange.
