# Supplementary material for: Annelid phylogeny and the status of Sipuncula and Echiura
Source: Springer Nature journal article supplement (doi:10.1186/1471-2148-7-57), 2007-04-05
Supplement: 12862_2006_351_MOESM3_ESM.pdf [file 12862_2006_351_MOESM3_ESM.pdf]

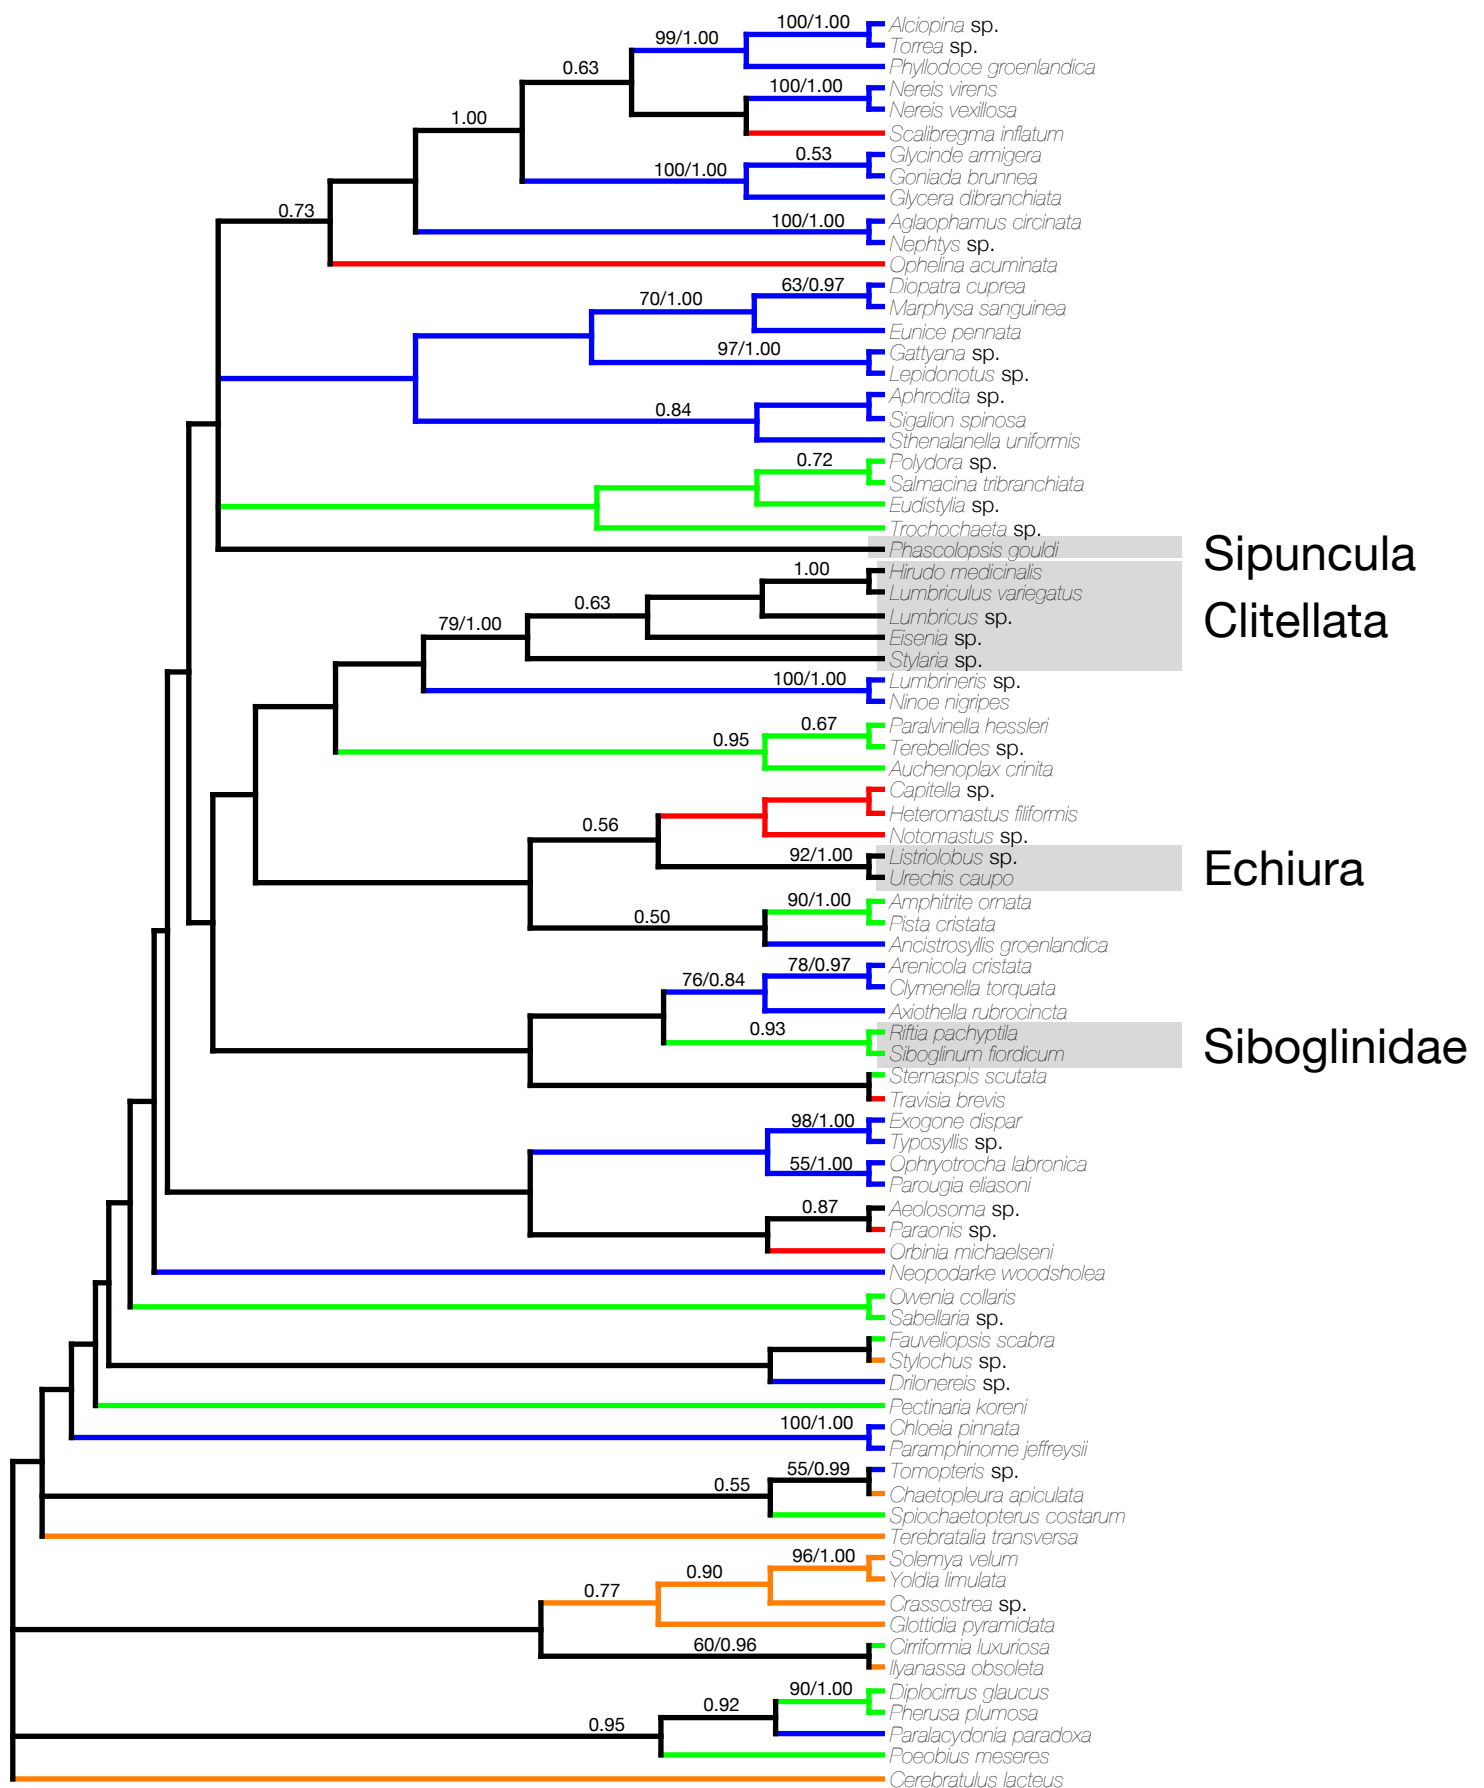

**Supplementary Fig. 3.** Strict consensus tree of 2 best ML trees and BI of EF1 $\alpha$  partition with 81 OTUs (-ln L = 14,231.29). EF1 $\alpha$  consisted of 1,274 characters, from which 673 unambiguously aligned and non-saturated ones were included. BS values above 50 shown at the branches on the left; PP's on the right or alone. ML settings: Base frequencies: A = 0.3618, C = 0.2314, G = 0.2263, T = 0.1805; transition/transversion ratio K = 1.368288;  $\alpha$  = 0.6642; Proportion of invariant sites = 0.3964. Models in BI: GTR+I+ $\Gamma$ . Clitellata, Echiura, Siboglinidae, Sipuncula highlighted with grey, Aciculata = blue, Canalipalpata = green, Scolecida = red, Outgroup = orange.
