# Supplementary material for: Annelid phylogeny and the status of Sipuncula and Echiura
Source: Springer Nature journal article supplement (doi:10.1186/1471-2148-7-57), 2007-04-05
Supplement: 12862_2006_351_MOESM4_ESM.pdf [file 12862_2006_351_MOESM4_ESM.pdf]

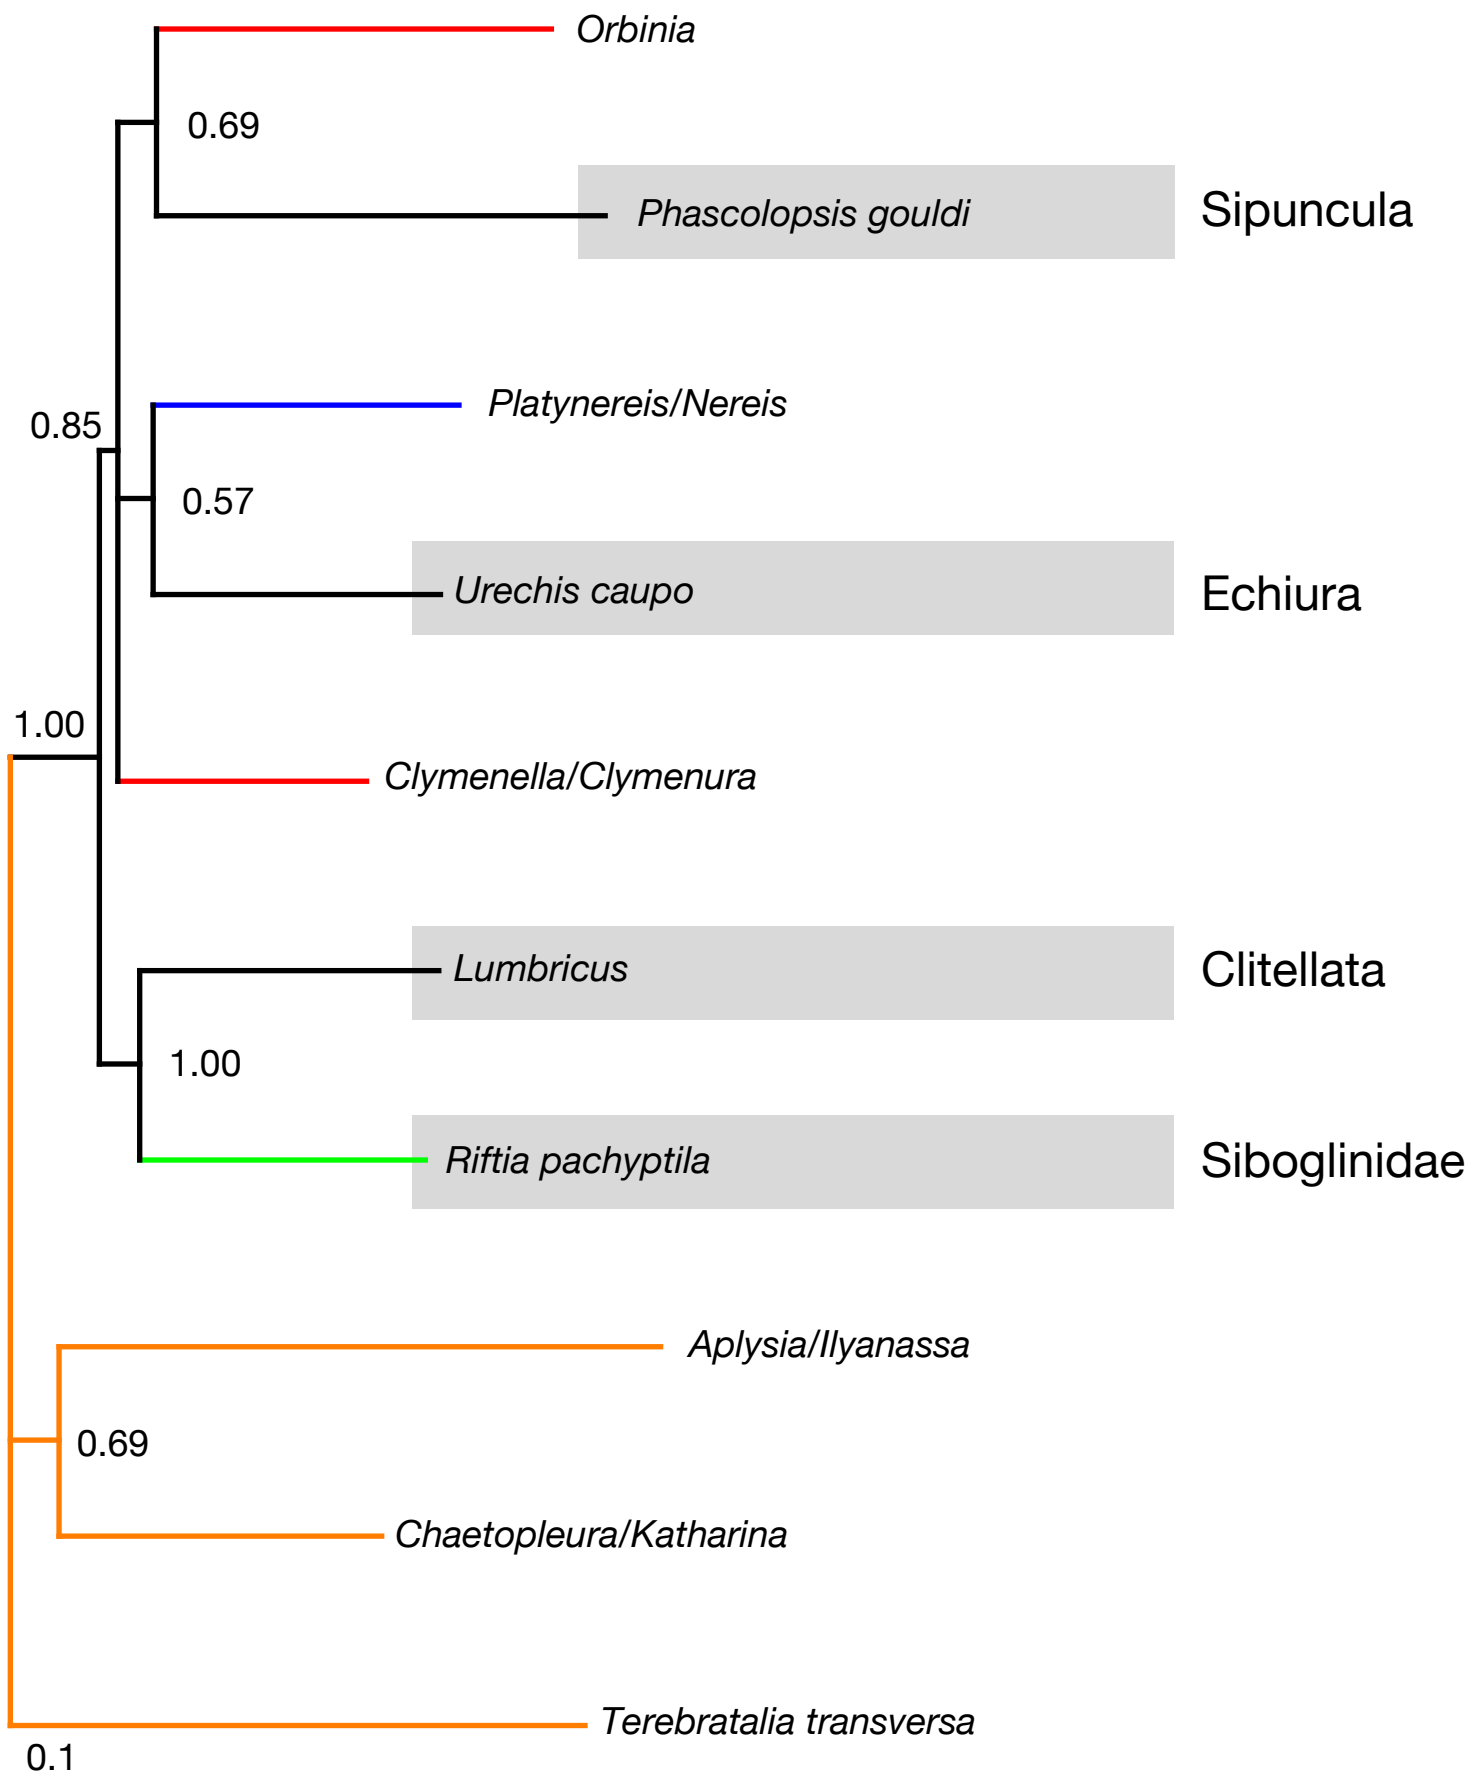

**Supplementary Fig. 4.** Cladogram of BI of NucMt data set with 10 OTUs and amino acids (-ln L = 39,898.71). NucMt with amino acids consisted of 12,347 characters, from which 6,638 unambiguously aligned and non-saturated ones were included. PP's above 50 shown. Models in BI: nucLSU, mtSSU: GTR+I+ $\Gamma$ ; nucSSU: K80+I+ $\Gamma$ ; mtLSU = GTR+ $\Gamma$ ; Ef1a, ATP8, COX1-3, CYTB, NAD6 = Protein model mixture. Clitellata, Echiura, Siboglinidae, Sipuncula highlighted with gray, Aciculata = blue, Canalipalpata = green, Scolecida = red, Outgroup = orange.
