# Supplementary material for: Annelid phylogeny and the status of Sipuncula and Echiura
Source: Springer Nature journal article supplement (doi:10.1186/1471-2148-7-57), 2007-04-05
Supplement: 12862_2006_351_MOESM5_ESM.pdf [file 12862_2006_351_MOESM5_ESM.pdf]

**Supplementary Table 1.** List of taxa used in the analyses with nucSSU, nucLSU and EF1 $\alpha$  sequence as well as the mitochondrial genome accession numbers, determined sequences are in bold. Localities and voucher numbers are attached with the accession number and are only given for taxa from which new sequences were determined.

| <b>Taxon</b>     | <b>Species</b>                                        | <b>nucSSU</b>   | <b>nucLSU</b>   | <b>EF1<math>\alpha</math></b> | <b>mtDNA</b> |
|------------------|-------------------------------------------------------|-----------------|-----------------|-------------------------------|--------------|
| Arenicolidae     | <i>Arenicola brasiliensis</i> (Nonato, 1958)          | <b>DQ790076</b> |                 |                               |              |
|                  | <i>Abarenicola affinis</i> (Ashworth, 1903)           |                 | <b>DQ790025</b> |                               |              |
|                  | <i>Arenicola cristata</i> Stimpson, 1855              |                 |                 | <b>DQ813351</b>               |              |
| Capitellidae     | <i>Heteromastus filiiformis</i> (Claparede, 1864)     | <b>DQ790081</b> | <b>DQ790038</b> | <b>DQ813369</b>               |              |
|                  | <i>Notomastus tenuis</i> Moore, 1909                  | <b>DQ790084</b> | <b>DQ790044</b> |                               |              |
|                  | <i>Notomastus</i> sp.                                 |                 |                 | <b>DQ813379</b>               |              |
|                  | <i>Capitella capitata</i> (Fabricius, 1780)           | AF508118        | <b>DQ790028</b> |                               |              |
|                  | <i>Capitella</i> sp.                                  |                 |                 | AB003706                      |              |
| Maldanidae       | <i>Clymenella torquata</i> (Leidy, 1855)              |                 | <b>DQ790030</b> | <b>DQ813356</b>               | NC006321     |
|                  | <i>Clymenura clypeata</i> (Saint-Joseph, 1894)        | AF448152        |                 |                               |              |
|                  | <i>Axiothella rubrocincta</i> (Johnson, 1901)         | <b>DQ790078</b> | <b>DQ790027</b> | <b>DQ813353</b>               |              |
| Opheliidae       | <i>Ophelina acuminata</i> Oersted, 1843               | <b>DQ790085</b> | <b>DQ790045</b> | AB003708                      |              |
| Orbiniidae       | <i>Orbinia swani</i> Pettibone, 1957                  | <b>DQ790087</b> | <b>DQ790048</b> |                               |              |
|                  | <i>Orbinia michaelsoni</i>                            |                 |                 | <b>DQ813381</b>               |              |
|                  | <i>Orbinia latreilli</i> (Audouin & Edwards, 1833)    |                 |                 |                               | AY961084     |
| Paranoidae       | <i>Paraonis</i> sp.                                   | <b>DQ790090</b> |                 | <b>DQ813386</b>               |              |
|                  | <i>Aricidea</i> sp.                                   |                 | <b>DQ790052</b> |                               |              |
| Scalibregmatidae | <i>Scalibregma inflatum</i> Rathke, 1843              | <b>DQ790093</b> | <b>DQ790060</b> | <b>DQ813397</b>               |              |
|                  | <i>Travisia brevis</i> Moore, 1923                    |                 | <b>DQ790069</b> | <b>DQ813407</b>               |              |
|                  | <i>Travisia forbesii</i> Johnston, 1840               | AF508127        |                 |                               |              |
| Aphroditidae     | <i>Aphrodita</i> sp.                                  | AY894295        | <b>DQ790024</b> | <b>DQ813350</b>               |              |
| Polynoidea       | <i>Gattyana ciliata</i> Moore, 1902                   | AY894297        | <b>DQ790035</b> |                               |              |
|                  | <i>Gattyana</i> sp.                                   |                 |                 | <b>DQ813365</b>               |              |
|                  | <i>Lepidonotus sublevis</i> Verrill, 1873             | AY894301        | <b>DQ790039</b> |                               |              |
|                  | <i>Lepidonotus</i> sp.                                |                 |                 | <b>DQ813370</b>               |              |
| Sigalionidae     | <i>Sigalion spinosus</i> (Hartman, 1939)              | AY894304        | <b>DQ790062</b> | <b>DQ813399</b>               |              |
|                  | <i>Sthenelanelia uniformis</i> Moore, 1910            | AY894306        | <b>DQ790064</b> | <b>DQ813402</b>               |              |
| Hesionidae       | <i>Ophiodromus pugettensis</i> (Johnson, 1901)        | <b>DQ790086</b> | <b>DQ790046</b> |                               |              |
|                  | <i>Neopodarke woodsholea</i> Hartman, 1965            |                 |                 | <b>DQ813375</b>               |              |
| Nereididae       | <i>Nereis succinea</i> (Frey and Leuchart, 1847)      | AY210447        | AY210464        |                               |              |
|                  | <i>Nereis virens</i> (M. Sars, 1835)                  |                 |                 | U90064                        |              |
|                  | <i>Nereis vexillosa</i> Grube, 1851                   | <b>DQ790083</b> | <b>DQ790043</b> | <b>DQ813377</b>               |              |
|                  | <i>Platynereis dumerlii</i>                           |                 |                 |                               | NC000931     |
| Pilargidae       | <i>Ancistrosyllis groenlandica</i> McIntosh, 1879     | <b>DQ790075</b> | <b>DQ790023</b> | <b>DQ813349</b>               |              |
| Syllidae         | <i>Exogone naidina</i> Oersted, 1845                  | AF474290        |                 |                               |              |
|                  | <i>Exogone verugera</i> (Claparede, 1868)             |                 | <b>DQ790033</b> |                               |              |
|                  | <i>Exogone dispar</i> (Webster, 1879)                 |                 |                 | <b>DQ813363</b>               |              |
|                  | <i>Typosyllis anoculata</i> (Hartmann-Schröder, 1962) | <b>DQ790098</b> | <b>DQ790071</b> |                               |              |
|                  | <i>Typosyllis</i> sp.                                 |                 |                 | <b>DQ813409</b>               |              |
| Glyceridae       | <i>Glycera dibranchiata</i> Ehlers, 1868              | AY995208        | AY995207        | <b>DQ813366</b>               |              |
| Goniadidae       | <i>Goniada brunnea</i> Treadwell, 1906                | <b>DQ790080</b> | <b>DQ790037</b> | <b>DQ813368</b>               |              |
|                  | <i>Glycinde armigera</i> Moore, 1911                  | <b>DQ790079</b> | <b>DQ790036</b> | <b>DQ813367</b>               |              |
| Nephtyidae       | <i>Nephtys longosetosa</i> (Oersted, 1842)            | <b>DQ790082</b> | <b>DQ790042</b> |                               |              |
|                  | <i>Nephtys</i> sp.                                    |                 |                 | <b>DQ813376</b>               |              |
|                  | <i>Aglaophamus circinata</i> (Verrill, 1874)          | <b>DQ790072</b> | <b>DQ790020</b> | <b>DQ813346</b>               |              |

| Taxon            | Species                                                    | nucSSU          | nucLSU          | EF1 $\alpha$    | mtDNA    |
|------------------|------------------------------------------------------------|-----------------|-----------------|-----------------|----------|
| Paralacydoniidae | <i>Paralacydonia paradoxa</i> Fauvel, 1913                 | <b>DQ790088</b> | <b>DQ790050</b> | <b>DQ813384</b> |          |
| Phyllodocidae    | <i>Phyllodoce groenlandica</i> (Oersted, 1843)             | <b>DQ790092</b> | <b>DQ790055</b> | <b>DQ813389</b> |          |
| Alciopidae       | <i>Alciopina</i> sp.                                       | <b>DQ790073</b> | <b>DQ790021</b> | <b>DQ813347</b> |          |
|                  | <i>Torrea</i> sp.                                          | <b>DQ790096</b> | <b>DQ790068</b> | <b>DQ813406</b> |          |
| Tomopteridae     | <i>Tomopteris</i> sp.                                      | <b>DQ790095</b> | <b>DQ790067</b> | <b>DQ813405</b> |          |
| Amphinomidae     | <i>Paramphinome jeffreysii</i> (Mcintosh, 1868)            | AY838856        | AY838865        | <b>DQ813383</b> |          |
|                  | <i>Eurythoë complanata</i> (Pallas, 1766)                  | AY364851        | AY364849        |                 |          |
|                  | <i>Chloeia pinnata</i> Moore, 1911                         |                 |                 | <b>DQ813354</b> |          |
| Dorvilleidae     | <i>Ophryotrocha labronica</i> La Greca & Bacci, 1962       | AY838855        | <b>DQ790047</b> | <b>DQ813380</b> |          |
|                  | <i>Parougia eliasoni</i> (Oug, 1978)                       | AF412798        | <b>DQ790053</b> | <b>DQ813387</b> |          |
| Eunicidae        | <i>Marphysa sanguinea</i> (Montagu, 1815)                  | AY525621        | AY838861        | <b>DQ813374</b> |          |
|                  | <i>Eunice</i> sp.                                          | AF412791        | AY732229        |                 |          |
|                  | <i>Eunice pennata</i> (O.F. Müller, 1776)                  |                 |                 | <b>DQ813362</b> |          |
| Lumbrineridae    | <i>Lumbrineris latreilli</i> Audouin & Milne-Edwards, 1834 | AY525623        | AY366512        |                 |          |
|                  | <i>Lumbrineris</i> sp.                                     |                 |                 | <b>DQ813373</b> |          |
|                  | <i>Ninoe nigripes</i> Pettibone, 1982                      | AY838852        | AY838862        | <b>DQ813378</b> |          |
| Oeonidae         | <i>Driloneris longa</i> Webster, 1879                      | AY838847        | AY838860        |                 |          |
|                  | <i>Driloneris</i> sp.                                      |                 |                 | <b>DQ813359</b> |          |
| Onuphidae        | <i>Diopatra aciculata</i> Knox and Cameron, 1971           | AY838845        | AY838858        |                 |          |
|                  | <i>Diopatra cuprea</i> (Bosc, 1802)                        |                 |                 | <b>DQ813357</b> |          |
| Oweniidae        | <i>Owenia fusiformis</i> delle Chiaje, 1841                | AF448160        | <b>DQ790049</b> |                 |          |
|                  | <i>Owenia collaris</i> Hartman, 1955                       |                 |                 | <b>DQ813382</b> |          |
| Sabellariidae    | <i>Sabellaria cementarium</i> Moore, 1906                  | AY732223        | AY732226        |                 |          |
|                  | <i>Sabellaria</i> sp.                                      |                 |                 | <b>DQ813395</b> |          |
| Sabellidae       | <i>Schizobranchia insignis</i> Bush, 1905                  | AY732222        | AY732225        |                 |          |
|                  | <i>Eudistylia</i> sp.                                      |                 |                 | <b>DQ813361</b> |          |
| Serpulidae       | <i>Serpula vermicularis</i> Linnaeus, 1767                 | AY732224        | AY732227        |                 |          |
|                  | <i>Salmacina tribranchiata</i> (Moore, 1923)               |                 |                 | <b>DQ813396</b> |          |
| Siboglinidae     | <i>Riftia pachyptila</i> Jones, 1981                       | AF168739        | Z21534          | <b>DQ813394</b> | AY741642 |
|                  | <i>Siboglinum fiordicum</i> Webb, 1963                     | X79876          | <b>DQ790061</b> | <b>DQ813398</b> |          |
| Cirratulidae     | <i>Cirratulus spectabilis</i> (Kinberg, 1866)              | AY708536        | <b>DQ790029</b> |                 |          |
|                  | <i>Cirriformia luxuriosa</i> (Moore, 1904)                 |                 |                 | <b>DQ813355</b> |          |
| Fauveliopsidae   | <i>Fauveliopsis scabra</i> Hartman & Fauchald, 1971        | AY708537        | <b>DQ790034</b> | <b>DQ813364</b> |          |
| Flabelligeridae  | <i>Diplocirrus glaucus</i> (Malmgren, 1867)                | AY708534        | <b>DQ790031</b> | <b>DQ813358</b> |          |
|                  | <i>Pherusa plumosa</i> (Müller, 1776)                      | AY708528        | <b>DQ790056</b> |                 |          |
|                  | <i>Piromis erecta</i>                                      |                 |                 | <b>DQ813390</b> |          |
| Poeobiidae       | <i>Poeobius meseres</i> Heath, 1930                        | AY708526        | <b>DQ790058</b> | <b>DQ813392</b> |          |
| Sternaspididae   | <i>Sternaspis scutata</i> (Ranzani, 1817)                  | AY532329        | <b>DQ790063</b> | <b>DQ813401</b> |          |
| Alvinellidae     | <i>Paralvinella</i> sp.                                    | <b>DQ790089</b> | <b>DQ790051</b> |                 |          |
|                  | <i>Paralvinella hessleri</i> Desbruyères & Laubier, 1989   |                 |                 | <b>DQ813385</b> |          |
| Ampharetidae     | <i>Auchenoplax crinita</i> Ehlers, 1887                    | <b>DQ790077</b> | <b>DQ790026</b> | <b>DQ813352</b> |          |
| Pectinariidae    | <i>Pectinaria gouldi</i> (Verrill, 1873)                   | <b>DQ790091</b> | <b>DQ790054</b> |                 |          |
|                  | <i>Pectinaria koreni</i> (Malmgren, 1866)                  |                 |                 | <b>DQ813388</b> |          |
| Terebellidae     | <i>Amphitrite ornata</i> (Leidy, 1855)                     | <b>DQ790074</b> | <b>DQ790022</b> | <b>DQ813348</b> |          |
|                  | <i>Pista cristata</i> (O. F. Mueller, 1776)                | AY611461        | <b>DQ790057</b> | <b>DQ813391</b> |          |
| Trichobranchidae | <i>Terebellides stroemi</i> Sars, 1835                     | <b>DQ790094</b> | <b>DQ790066</b> |                 |          |
|                  | <i>Terebellides</i> sp.                                    |                 |                 | <b>DQ813404</b> |          |
| Chaetopteridae   | <i>Chaetopterus variopedatus</i> (Renier, 1804)            | U67324          | AY145399        |                 |          |
|                  | <i>Spiochaetopterus costarum</i> (Claparède, 1870)         |                 |                 | <b>DQ813400</b> |          |
| Spionidae        | <i>Polydora ciliata</i> (Johnston, 1838)                   | U50971          |                 |                 |          |
|                  | <i>Polydora</i> sp.                                        |                 | <b>DQ790059</b> | <b>DQ813393</b> |          |
| Trochochaetidae  | <i>Trochochaeta</i> sp.                                    | <b>DQ790097</b> | <b>DQ790070</b> | <b>DQ813408</b> |          |
| Clitellata       | <i>Lumbricus terrestris</i> Linnaeus, 1758                 | AJ272183        |                 |                 | NC001673 |
|                  | <i>Lumbricus</i> sp.                                       |                 | <b>DQ790041</b> | <b>DQ813372</b> |          |
|                  | <i>Lumbriculus variegatus</i> (Mueller, 1774)              | AY040693        |                 | AF063422        |          |
|                  | <i>Lumbriculus</i> sp.                                     |                 | <b>DQ790040</b> |                 |          |
|                  | <i>Eisenia foetida</i> Savigny, 1826                       | AB076887        |                 | <b>DQ813360</b> |          |
|                  | <i>Eisenia</i> sp.                                         |                 | <b>DQ790032</b> |                 |          |
|                  | <i>Stylaria</i> sp.                                        | U95946          | <b>DQ790065</b> | <b>DQ813403</b> |          |

| <b>Taxon</b>                      | <b>Species</b>                                 | <b>nucSSU</b> | <b>nucLSU</b>   | <b>EF1<math>\alpha</math></b> | <b>mtDNA</b> |
|-----------------------------------|------------------------------------------------|---------------|-----------------|-------------------------------|--------------|
| Clitellata                        | <i>Hirudo medicinalis</i> Linnaeus, 1758       | Z83752        | AY364866        | U90063                        |              |
| Aeolosomatidae                    | <i>Aeolosoma</i> sp.                           | Z83748        | <b>DQ790019</b> | <b>DQ813345</b>               |              |
| <b>Possible Annelidan Subtaxa</b> |                                                |               |                 |                               |              |
| Echiura                           | <i>Arhynchite pugettensis</i> Fisher, 1949     | AY210441      | AY210455        |                               |              |
|                                   | <i>Listriolobus</i> sp.                        |               |                 | <b>DQ813371</b>               |              |
|                                   | <i>Urechis caupo</i> Fisher & MacGinitie 1928  | AF119076      | AF519268        | <b>DQ813410</b>               | NC006379     |
| Sipuncula                         | <i>Phascolopsis gouldi</i> (Pourtalès, 1851)   | AF342796      | AF342795        | AF063421                      | AF374337     |
| <b>Outgroups</b>                  |                                                |               |                 |                               |              |
| Bivalvia                          | <i>Crassostrea virginica</i> (Gmelin, 1791)    | AB064942      | AY145400        |                               |              |
|                                   | <i>Crassostrea</i> sp.                         |               |                 | <b>DQ813412</b>               |              |
|                                   | <i>Solemya velum</i> Say, 1822                 | AF120524      | AY145421        | <b>DQ813415</b>               |              |
|                                   | <i>Yoldia limaluta</i> (Say, 1831)             | AF120528      | AY145424        | <b>DQ813417</b>               |              |
| Gastropoda                        | <i>Ilyanassa obsoleta</i> (Say, 1822)          | AY145379      | AY145411        |                               |              |
|                                   | <i>Ilyanassa</i> sp.                           |               |                 | <b>DQ813414</b>               |              |
|                                   | <i>Aplysia californica</i> J.G. Cooper, 1863   |               |                 |                               | NC005827     |
| Polyplacophora                    | <i>Chaetopleura apiculata</i> (Say, 1834)      | AY145370      | AY145398        | U90062                        |              |
|                                   | <i>Katharina tunicata</i> (Wood, 1815)         |               |                 |                               | NC001636     |
| Brachiopoda                       | <i>Terebratalia transversa</i> (Sowerby, 1846) | AF025945      | AF342802        | <b>DQ813416</b>               | NC000941     |
|                                   | <i>Glottidia pyramidata</i> (Stimpson, 1860)   | U12647        | AY210459        | <b>DQ813413</b>               |              |
| Nemertea                          | <i>Cerebratulus lacteus</i> (Leidy, 1851)      | AY145368      | AY145396        | <b>DQ813411</b>               |              |
| Platyhelminthes                   | <i>Stylochus</i> sp.                           | AF342801      | AF342800        | AY580253                      |              |
