# Supplementary material for: Annelid phylogeny and the status of Sipuncula and Echiura
Source: BMC Evol Biol. 2007 Apr 5;7:57. doi: 10.1186/1471-2148-7-57 (PMC1855331; doi:10.1186/1471-2148-7-57)
Supplement: Additional file 7 — Substitution models used in analyses. This file contains a list of Models used in Maximum Likelihood and Bayesian Inference analyses. [file 1471-2148-7-57-S7.pdf]

**Supplementary Table 2.** Models used in Maximum Likelihood (ML) and Bayesian Inference (BI) analyses of each partition and data set and the corresponding settings.

[illegible]
